# Supplementary material for: Adiponectin Deficiency Alters Placenta Function but Does Not Affect Fetal Growth in Mice
Source: MDPI journal article supplement (doi:10.3390/ijms23094939), 2022-04-29
Supplement: s1 [file s1]

**Table S1.** Body composition in female mice after 8 weeks on control diet (CD) or high fat/high sucrose (HF/HS) diet.

|                    | wt-CD<br>(n=7) | APNhet-<br>CD<br>(n=8) | APNko-<br>CD<br>(n=9) | wt-HF/HS<br>(n=9) | APNhet-<br>HF/HS<br>(n=8) | APNko-<br>HF/HS<br>(n=7) | two-way<br>ANOVA                           |
|--------------------|----------------|------------------------|-----------------------|-------------------|---------------------------|--------------------------|--------------------------------------------|
| Body weight (g)    | 18.9 ± 0.6     | 19.7 ± 0.7             | 20.8 ± 1.2            | 22.7 ± 0.9        | 24.4 ± 1.1                | 24.6 ± 1.3               | a F <sub>(1, 38)</sub> =20.36,<br>P<0.0001 |
| Fat mass (%)       | 13.9 ± 0.3     | 15.9 ± 0.2             | 16.2 ± 1.1            | 24.1 ± 1.7        | 23.7 ± 2.3                | 26.6 ± 2.2               | a F <sub>(1, 38)</sub> =43.45,<br>P<0.0001 |
| Lean mass (g)      | 16.3 ± 0.5     | 16.6 ± 0.6             | 17.4 ± 0.8            | 17.1 ± 0.4        | 18.5 ± 0.7                | 18.0 ± 0.7               |                                            |
| b-glucose (mmol/L) | 6.4 ± 0.4      | 5.9± 0.3               | 6.8± 0.3              | 7.1 ± 0.4         | 7.1± 0.3                  | 7.0± 0.3                 | a F <sub>(1, 38)</sub> = 4.61,<br>P=0.038  |
| s-insulin (ug/L)   | 0.22 ± 0.04    | 0.43 ± 0.06*           | 0.45 ± 0.07 *         | 0.80± 0.20        | 0.45 ± 0.09               | 0.70 ± 0.13              | a F <sub>(1, 38)</sub> =6.65,<br>P=0.014   |

The main effect of diet and genotype; adiponectin knockout (APNko), adiponectin heterozygote (APNhet), and wild-type (wt) was analyzed by two-way ANOVA. a; main effect of diet, there was no interaction effect. The effect of genotype within diet was analyzed using Brown-Forsythe ANOVA test with Dunnett's multiple comparisons test. \* P<0.05 vs wt within diet. Data are presented as mean ± SEM.

**Table S2.** RT-PCR primer sequences

| <b>Gene</b>                       | <b>Forward primer 5'-3'</b>  | <b>Reverse primer 5'-3'</b> |
|-----------------------------------|------------------------------|-----------------------------|
| <i>Actb</i>                       | GACCCAGATCATGTTTGAGA         | GAGCATAGCCCTCGTAGAT         |
| <i>Gapdh</i>                      | ATGGCCTTCCGTGTTCTAC          | GCCTGCTTCACCACCTTCTT        |
| <i>Hprt1</i>                      | CCCTGGTTAAGCAGTACAGCCCC      | AGTCTGGCCTGTATCCAACACTTCG   |
| <i>Lpl</i>                        | TGGATGAGCGACTCCTACTTCA       | CGGATCCTCTCGATGACGAA        |
| <i>Cd36</i>                       | GGTCCTTACACTACAGAGTTCGTTA    | CATTGGGCTGTACAAAAGACACA     |
| <i>Slc7a5</i>                     | GGCGTACATCAGCGTCAT           | GTTACGTCCTCAAGACTGTT        |
| <i>Slc38a4</i>                    | TCACACTGCTGTTTCCAAGG         | CAGCCGGAAGAATGAAAATC        |
| <i>Snat2</i>                      | GCAGCCGGAGAAGGATGATGAAC      | GAAGAGGGCGGCAAGCAAATACA     |
| <i>Slc2a3</i>                     | ATGGGGACAACGAAGGTGAC         | GTCTCAGGTGCATTGATGACTC      |
| <i>Ppar<math>\gamma</math></i>    | TTGAGTGCCGAGTCTGTGG          | GGCATTGTGAGACATCCCCA        |
| <i>Ppargc1<math>\alpha</math></i> | TATGGAGTGACATAGAGTGTGCT      | CCACTTCAATCCACCCAGAAAG      |
| <i>Vegf</i>                       | ATGCTCCTCCTAGTAACTGTGTCTGACT | CTCGAAGCCACAGGCTGATG        |
| <i>Prokr1</i>                     | GCCATTGCCATTGACAGGTA         | TGGTGAAGTAGGCAGCTGGA        |

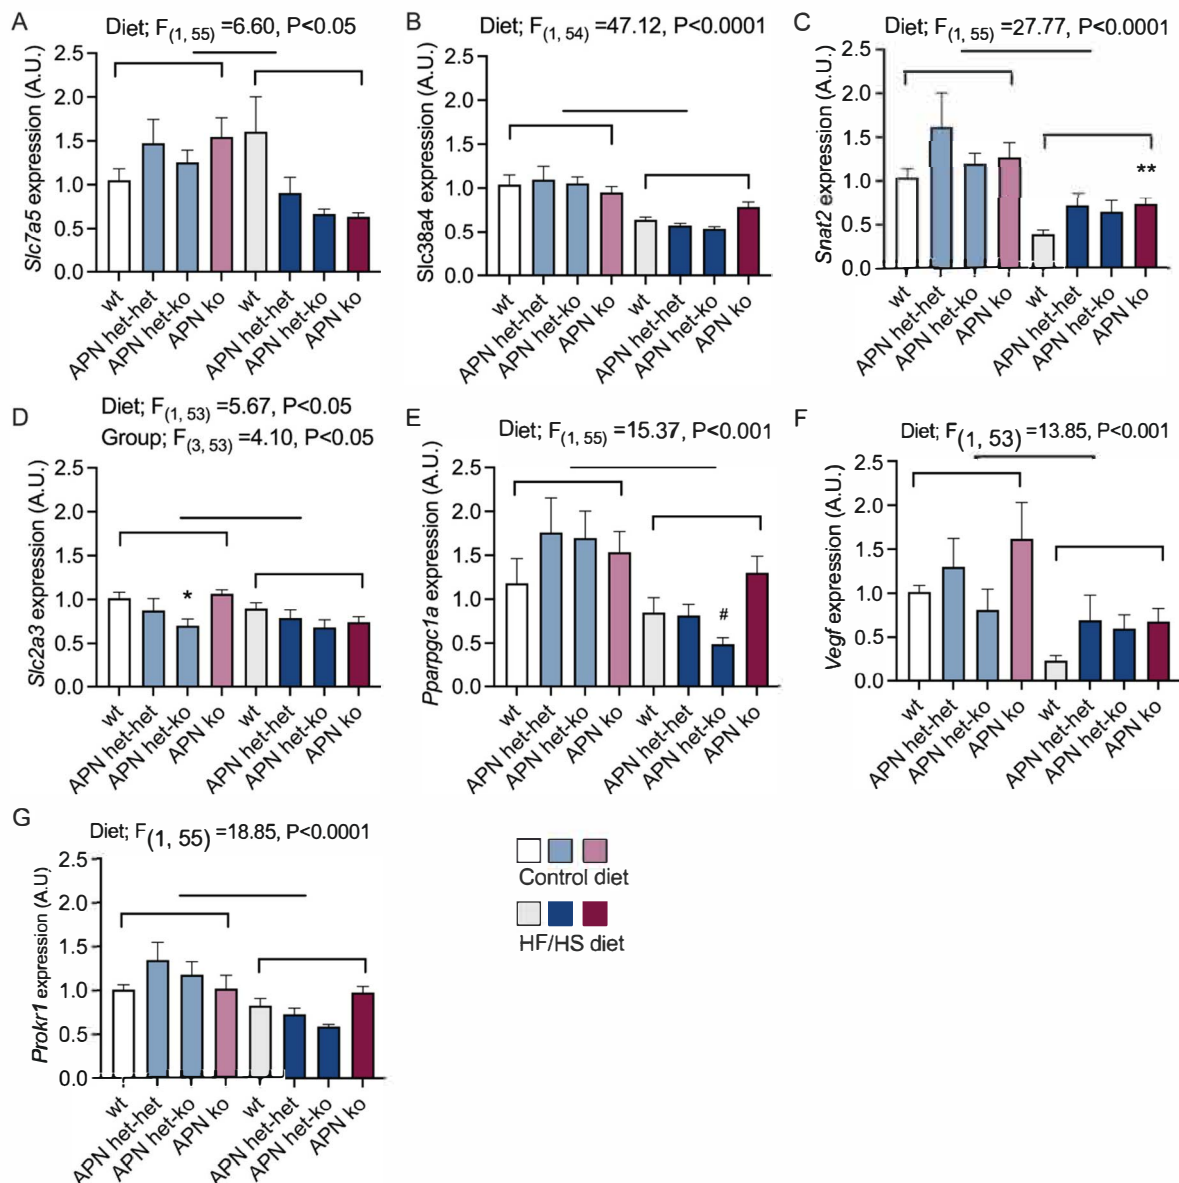

Supplemental Figure S1. Placenta gene expression of *Slc7a5* (A), *Slc38a4* (B), *Snat2* (C), *Slc2a3* (D), *Ppargc1a* (E), *Vegf* (F), and *Prokr1* (G) from adiponectin knockout (APN ko), adiponectin heterozygote (APN het), and wild-type (wt) dams on control or high-fat/high-sucrose (HF/HS) diet. The effect of diet-induced obesity and dam genotype (wt, APN het, and APN ko) was analyzed using two-way ANOVA. The effect of genotype within diet was analyzed using Brown-Forsythe ANOVA test with Dunnett's multiple comparisons test. \*\*  $P < 0.01$  vs wt within diet. #  $P < 0.05$  APN het-het vs APN het-ko. Data are presented as mean  $\pm$  SEM.
